# Supplementary material for: “I Just Want You to Hear That Term”: Characterizing Language Used in Fetal Cardiology Consultations
Source: MDPI journal article supplement (doi:10.3390/jcdd10090394), 2023-09-13
Supplement: s1 [file s1]

## Supplementary Materials

**Figure S1. (a,b)** Language used in fetal cardiology consultations, coded from beginning of the consultation to the end with each segment categorized as medical, plain, patient-centered language or small talk.

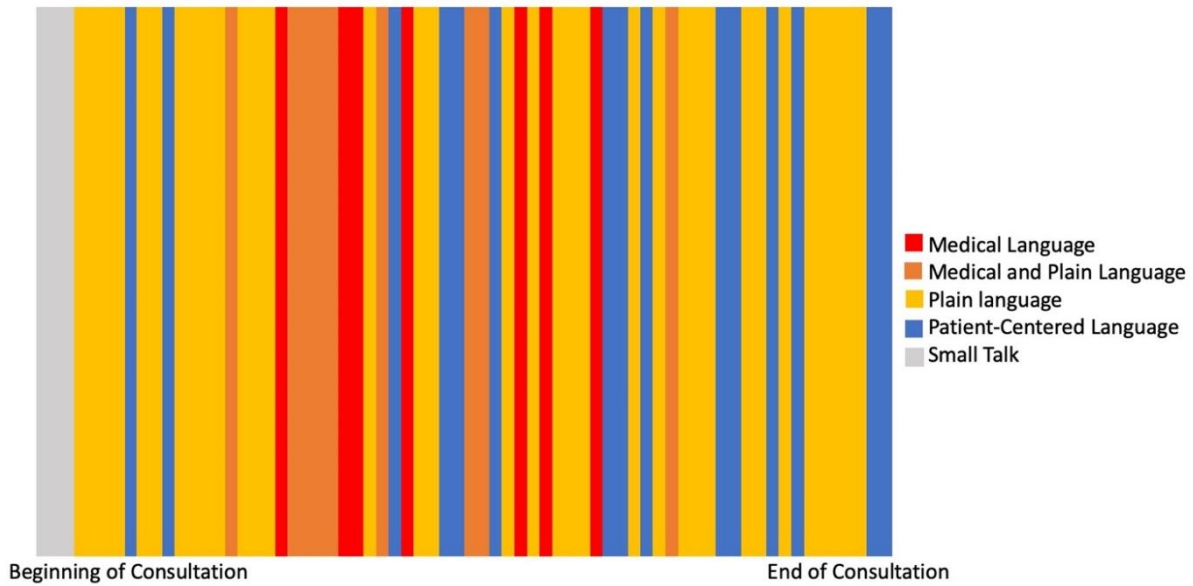

(a)

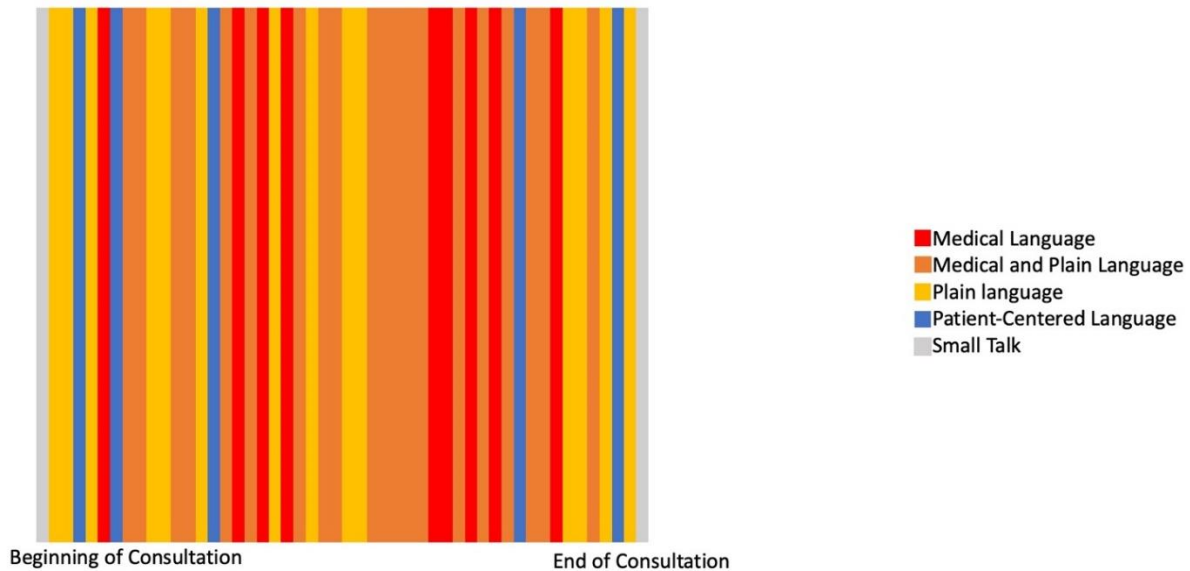

(b)
